# Supplementary material
Source: PubMed Central journal article supplement (PMC8375361)
Supplement: NIHMS1717576-supplement-mmc1.pdf [file NIHMS1717576-supplement-mmc1.pdf]

**Current Biology, Volume 31**

**Supplemental Information**

**Neurally driven synthesis  
of learned, complex vocalizations**

**Ezequiel M. Arneodo, Shukai Chen, Daril E. Brown II, Vikash Gilja, and Timothy Q. Gentner**

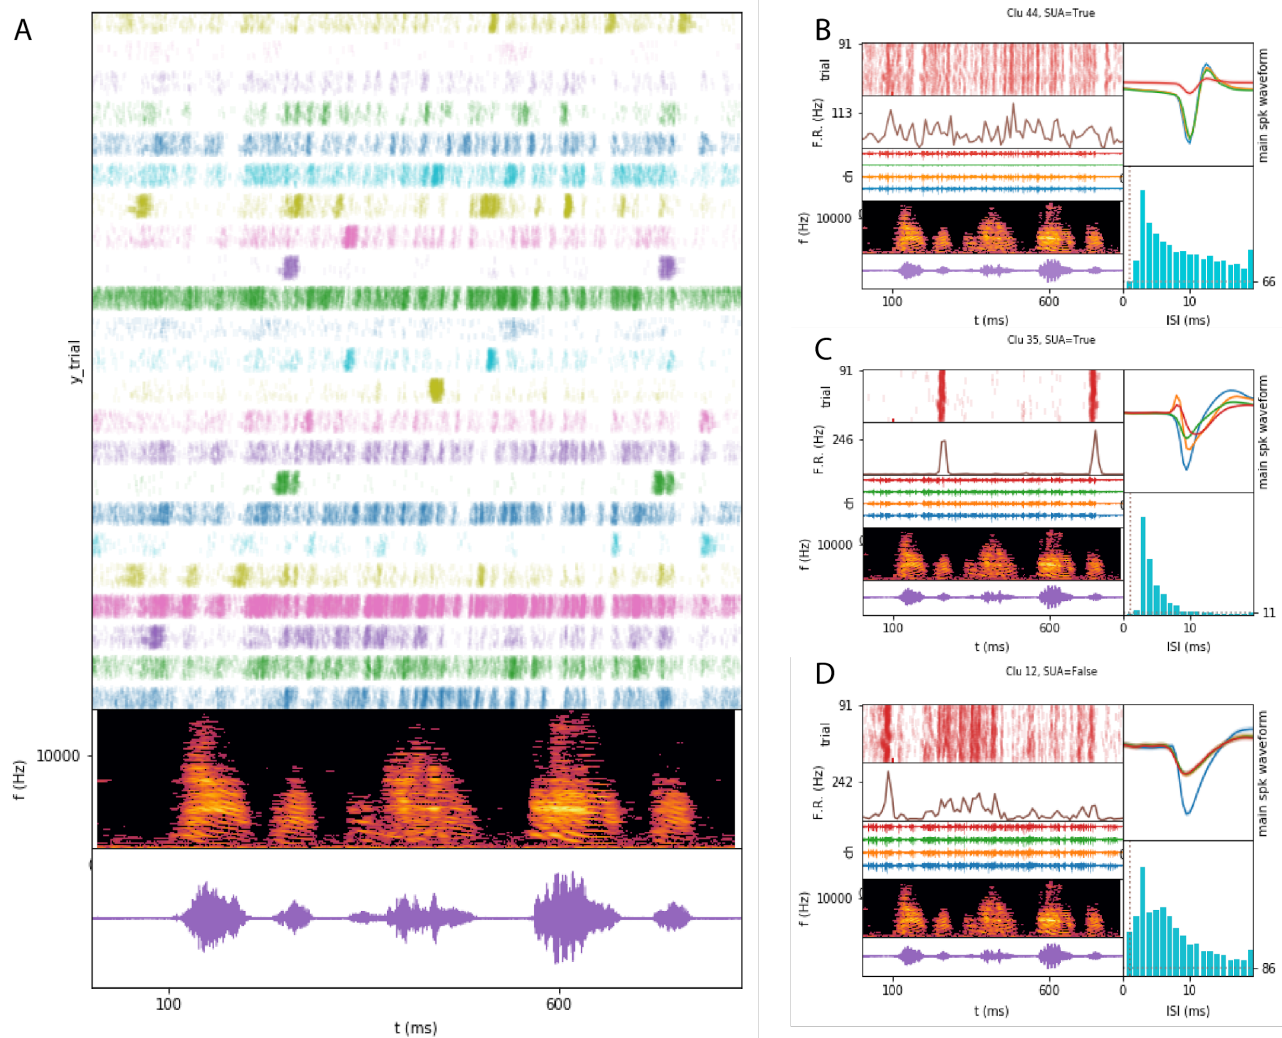

**Figure S1. Example clusters of sorted units, Related to Figure 1**

**(A)** Raster plots of 23 automatically clustered units, for 91 repetitions of a motif, spanning 12 hours of recording (top), aligned to an example motif's spectrogram (middle) and waveform (bottom). **(B)** Example of a (putatively) single unit activity cluster (SUA), likely an interneuron ( $HVC_I$ ). In the left panels are, from bottom to top: the raster; the corresponding histogram (10ms bin); example traces of the 4 neural channels where the cluster's representative waveform has the largest amplitudes; spectrogram of an example motif; waveform of an example motif. In the right panels: (top) a representative waveform for the cluster (mean of 10,000 events), plotted for the 4 channels with the largest amplitude (peak to trough) and (bottom) inter-spike-interval (ISI) histogram (0.5ms bins). Vertical dotted line indicates 1ms, horizontal dotted line indicates 3% level of refractory period violations. **(C)** Example of a (putatively) SUA cluster, likely a projection neuron ( $HVC_X$  or  $HVC_{RA}$ ). **(D)** Example of a (putatively) multi unit activity cluster (MUA). For this study, we used the highest yield session for each bird (z007: 29 MUA, 11  $HVC_I$ , 12  $HVC_{X/RA}$ ; z017: 18 MUA, 4  $HVC_I$ ; z020: 19 MUA, 2  $HVC_I$ ; z028: 22 MUA, 4  $HVC_I$ , 11  $HVC_{X/RA}$ ).

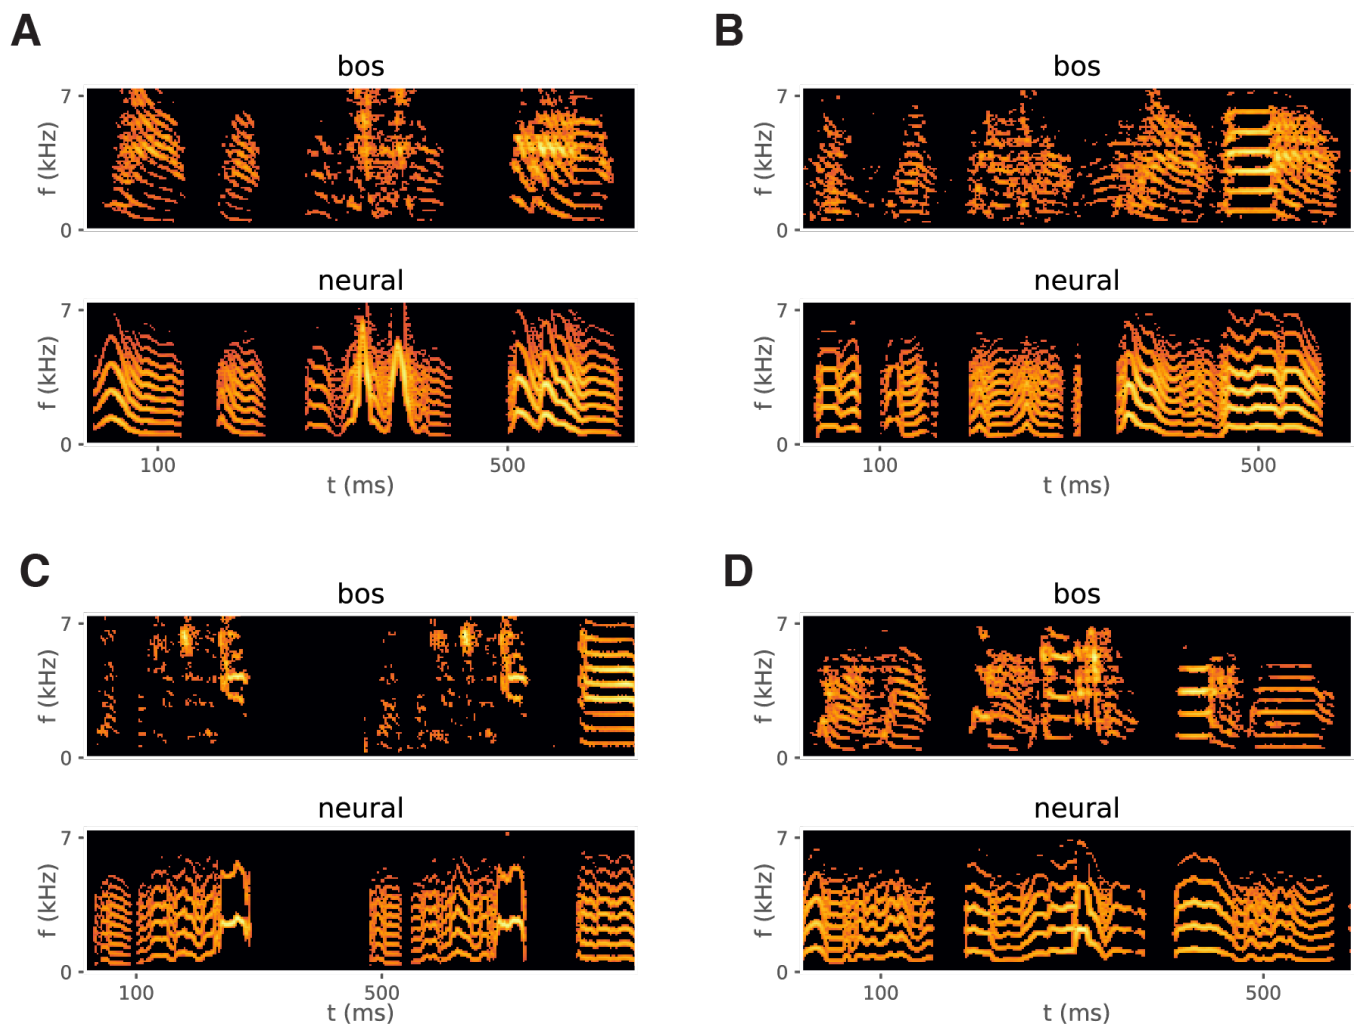

**Figure S2. Song synthesized from premotor neural activity via a biomechanical model of the vocal organ using supra-threshold, unsorted spiking events is similar to the recorded bird's own song, Related to Figure 2**

(A-D) Spectrogram of a bird's motif (BOS) (upper) and corresponding song generated by inferring the biomechanical model parameters from neural activity using a shallow FFNN and integrating the model, with thresholded activity instead of sorted spikes, for four different birds (z007, z017, z020, z028, respectively; see also Audio S1, S2, S3, S4, respectively).

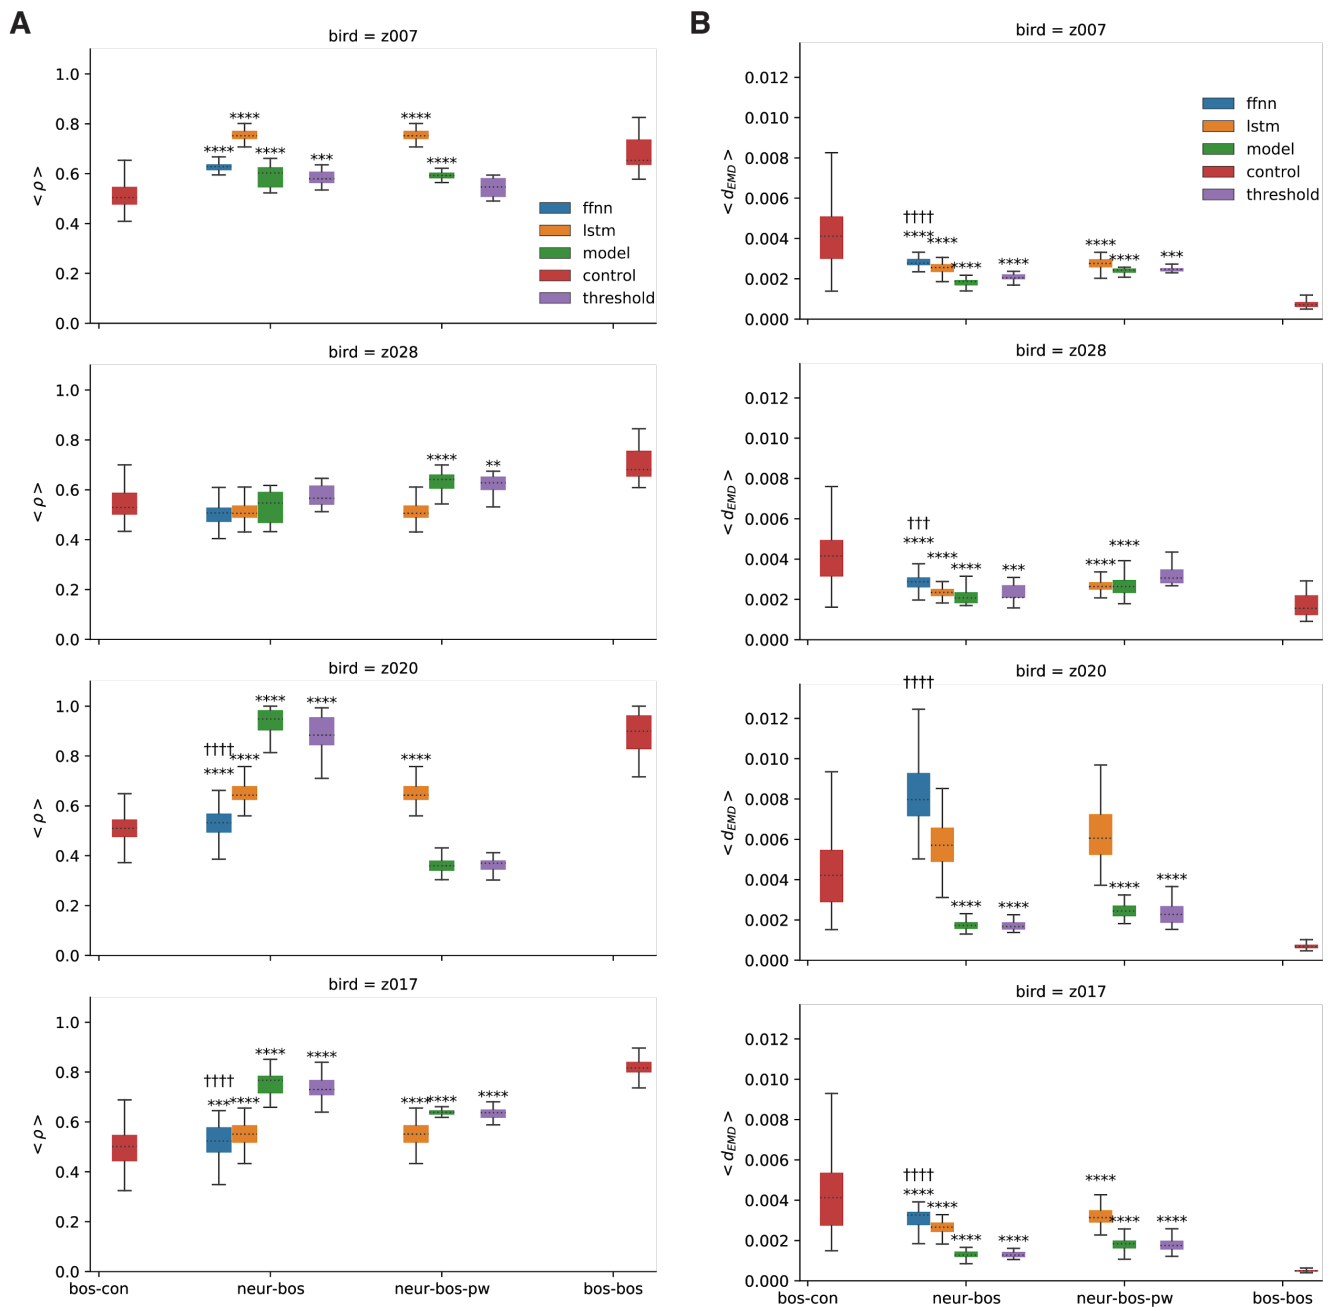

**Figure S3. Performance comparisons for each of the birds, related to Figure 4**

Legend for each panel is the same as for Figure 4. (A) Pairwise correlations, as in Figure 4 with the addition of piece-wise song training outcomes, for all four birds (z007, z017, z020, z028, from top to down). The termination *-pw* indicates that the training/testing was done piece-wise (see methods). (B) Pairwise EMD for all four birds (z007, z017, z020, z028, from top to down) (\*\*:  $p < 0.01$ ; \*\*\*:  $p < 0.001$ ; \*\*\*\*:  $p < 0.0001$ , Mann-Whitney U test, one sided against *bos-con*. ††††:  $p < 0.0001$ , Mann-Whitney U test, one sided against (neu-bos, model))

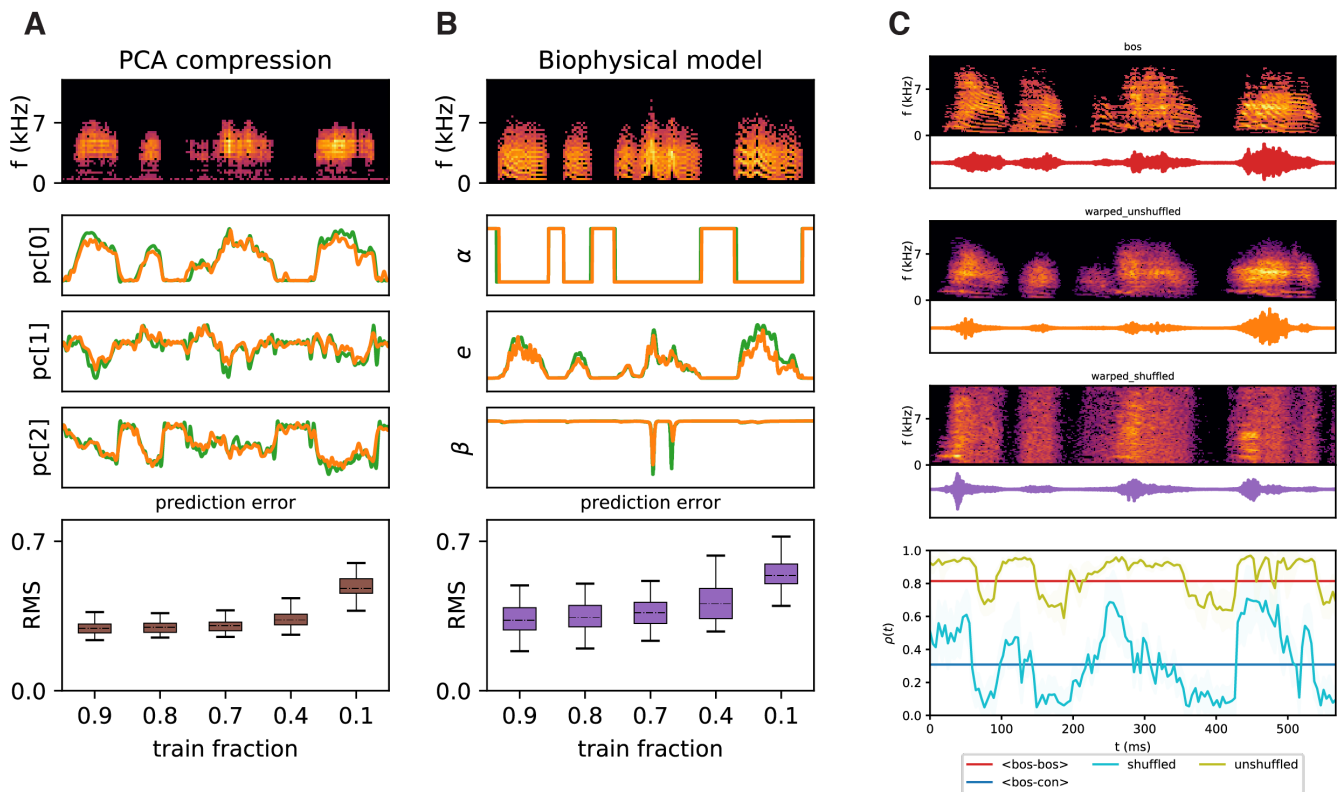

**Figure S4. Dimensionality reduction and temporal structure enhance the synthesis of song from neural activity, Related to Figures 2 and 3**

**(A)** Spectrogram of a song motif reconstructed from neural activity after training a FFNN with the 3 principal components (top); detail of the target (green line) and reconstruction (yellow line) of the principal components (middle); error in the reconstruction (as RMS between prediction/target) of the traces compressing the song as a function of the fraction of total motifs in the training set. **(B)** Same as in (A), but with the parameters of the biomechanical model serving as a representation of the song. **(C)** Song synthesized from neural activity with an LSTM, when the temporal structure is destroyed. First panel from top: spectrogram and waveform of a bird's own song (BOS) motif. Second panel: spectrogram and waveform of a reconstructed bird motif, trained and tested on neural and vocal data after DTW. Third panel: spectrogram and waveform of a reconstructed motif, trained and tested on neural activities and warped shuffled vocal data. A shuffle mask was applied to the spectrograms; the shown reconstructed spectrogram has the shuffle mask reversed. Bottom panel: shuffled (cyan) vs unshuffled (gold) performance comparisons, expressed as spectral correlation to BOS across time. Horizontal lines show the mean across time of the bos-bos spectral correlation ( $\langle \text{bos-bos} \rangle$ , red), and the mean comparison with motifs from a pool of conspecific birds ( $\langle \text{bos-con} \rangle$ , blue).
